# Supplementary material
Source: publisher site journal article supplement (https://www.dovepress.com/article/176142)
Supplement: Supplementary file 1 [file get_supplementary_file.php]

Supplementary Information: Factors associated with choice of intensification treatment for type 2 diabetes after metformin monotherapy: a cohort study in UK primary care

| Drug              | N            | %     |
|-------------------|--------------|-------|
| Insulin           | 368          | 34.0  |
| TZDs              | 290          | 26.8  |
| GLP1              | 286          | 26.45 |
| SUs and DPP4is    | 55           | 5.1   |
| Glinides          | 14           | 1.3   |
| SU and insulin    | 14           | 1.3   |
| DPP4i and insulin | 11           | 1.0   |
| Drug classes n<10 | 44           | 4.1   |
| <b>Total</b>      | <b>1,082</b> |       |

**Supplementary Table 1:** Drugs prescribed at first stage of intensification, other than the drug classes of interest.  
**Abbreviations:** SU: Sulfonylurea, DPP4i: dipeptidyl peptidase 4inhibitors, TZD: Thiazolidinediones, GLP1: Glucagon-like peptide-1

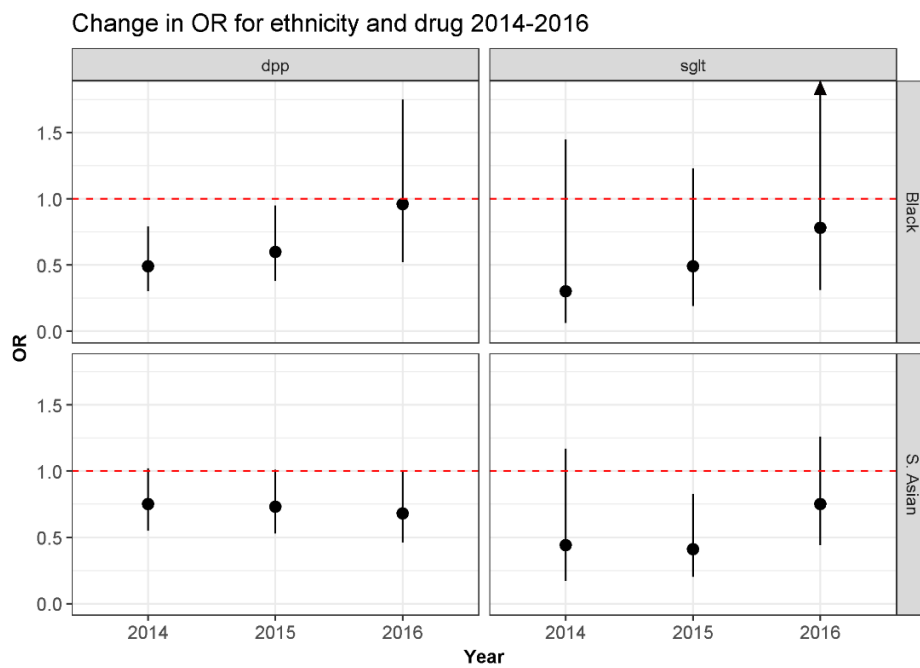

**Supplementary Figure 1:** Odds Ratios of the association between prescription for DPP4i and SGLT2i, and South Asian and Black ethnicity for 2014-2016 (excluding time as a covariate)

| Variable                                    |                    | Insulin<br>N=368 | Other combinations<br>n=714 |
|---------------------------------------------|--------------------|------------------|-----------------------------|
| Age category (years)                        | < 30               | 17 (4.6)         | 9 (1.3)                     |
|                                             | 30 to 39           | 43 (11.7)        | 45 (6.3)                    |
|                                             | 40 to 49           | 53 (14.4)        | 139 (19.5)                  |
|                                             | 50 to 59           | 74 (20.1)        | 224 (31.4)                  |
|                                             | 60 to 69           | 78 (21.2)        | 185 (25.9)                  |
|                                             | 70 to 79           | 63 (17.1)        | 88 (12.3)                   |
|                                             | ≥80                | 40 (10.9)        | 24 (3.4)                    |
| Gender                                      | Female             | 175 (47.6)       | 321 (45)                    |
| BMI                                         | Underweight/normal | 59 (17.2)        | 47 (6.7)                    |
|                                             | Overweight         | 102 (29.7)       | 132 (18.7)                  |
|                                             | Obese              | 182 (53.1)       | 526 (74.6)                  |
|                                             | Missing            | 25 (6.8)         | 9 (1.3)                     |
| Ethnicity                                   | White              | 160 (82.1)       | 394 (90.6)                  |
|                                             | South Asian        | 16 (8.2)         | 19 (4.4)                    |
|                                             | Black              | 12 (6.2)         | 12 (2.8)                    |
|                                             | Other              | 6 (3.1)          | 9 (2.1)                     |
|                                             | Mixed              | n <5             | n <5                        |
|                                             | Missing            | 173 (47)         | 279 (39.1)                  |
| Patient-level index of multiple deprivation | 1 LEAST deprived   | 40 (20.6)        | 62 (17.2)                   |
|                                             | 2                  | 36 (18.6)        | 64 (17.7)                   |
|                                             | 3                  | 42 (21.6)        | 69 (19.1)                   |
|                                             | 4                  | 37 (19.1)        | 86 (23.8)                   |
|                                             | 5 MOST deprived    | 39 (20.1)        | 80 (22.2)                   |
|                                             | Missing            | 174 (47.3)       | 353 (49.4)                  |
| Alcohol status                              | Non-drinker        | 84 (25.7)        | 90 (13.1)                   |
|                                             | Ex-drinker         | 42 (12.8)        | 92 (13.4)                   |
|                                             | Current drinker    | 201 (61.4)       | 507 (73.6)                  |
|                                             | Missing            | 41 (11.1)        | 25 (3.5)                    |
| Smoking status                              | Non-smoker         | 145 (40.1)       | 259 (36.3)                  |
|                                             | Current            | 72 (19.9)        | 138 (19.4)                  |
|                                             | Ex-smoker          | 145 (40.1)       | 316 (44.3)                  |
|                                             | Missing            | 6 (1.6)          | n <5                        |
| Day since first metformin prescription      | Mean (SD)          | 561 (907)        | 1124 (1069)                 |
| HbA1c (mmol/mol)                            | Mean (SD)          | 85 (30)          | 77 (21)                     |
|                                             | < 53 (7%)          | 29 (15.8)        | 45 (10.6)                   |
|                                             | 53 to 74           | 54 (29.5)        | 184 (43.2)                  |
|                                             | >75 (9%)           | 100 (54.6)       | 197 (46.2)                  |
|                                             | Missing            | 185 (50.3)       | 288 (40.3)                  |
| eGFR (ml/min/1.73m <sup>2</sup> )           | Mean (SD)          | 91 (24)          | 94 (19)                     |
| eGFR category (ml/min/1.73m <sup>2</sup> )  | < 60               | 27 (14.1)        | 40 (9.3)                    |
|                                             | 60 to 89           | 73 (38)          | 136 (31.7)                  |
|                                             | ≥ 90               | 92 (47.9)        | 253 (59)                    |
|                                             | Missing            | 176 (47.8)       | 285 (39.9)                  |
| Proteinuric renal disease                   |                    | 7 (1.9)          | 14 (2)                      |
| Raised ACR                                  |                    | 35 (35.4)        | 71 (23.5)                   |
|                                             | Missing            | 269 (73.1)       | 412 (57.7)                  |
| Neuropathy                                  |                    | 33 (9)           | 42 (5.9)                    |
| Amputation                                  |                    | 5 (1.4)          | 11 (1.5)                    |
| Retinopathy                                 |                    | 66 (17.9)        | 119 (16.7)                  |
| Blindness                                   |                    | n <5             | 8 (1.1)                     |
| >1 sign of microvascular disease            |                    | 116 (31.5)       | 211 (29.6)                  |
| Systolic BP (mmHg)                          | Mean (SD)          | 130 (17)         | 134 (15)                    |
|                                             | Missing            | 15 (4.1)         | 12 (1.7)                    |
| CVD                                         |                    | 69 (18.8)        | 77 (10.8)                   |
| Heart failure                               |                    | 9 (2.4)          | 6 (0.8)                     |
| ACEi or ARB prescription                    |                    | 183 (49.7)       | 378 (52.9)                  |
| Statin prescription                         |                    | 212 (57.6)       | 502 (70.3)                  |

**Supplementary Table 2:** Patient demographic and lifestyle factors for people prescribed insulin or other drug options at the first stage of intensification. Numbers are N (%) unless otherwise stated. **Abbreviations:** SU: Sulfonylurea, DPP4i: dipeptidyl peptidase 4inhibitors, SGLT2i: Sodium-glucose co-transporter-2 inhibitors, HbA1c: Haemoglobin A1c, eGFR: estimated Glomerular Filtration Rate, BMI: Body mass index, BP: Blood pressure, ACEi: Angiotensin-converting-enzyme inhibitor, ARB: Angiotensin II receptor blockers, SD: Standard Deviation, ACR: Albumin creatinine ratio

| Variable                               | SU, Ref | DPP4i, OR (95% CI) | SGLT2i, OR (95% CI)  |
|----------------------------------------|---------|--------------------|----------------------|
| <b>Age, years</b>                      |         |                    |                      |
| < 30                                   | 1       | 1.78 (1.03, 3.10)  | 3.55 (1.68, 7.51)    |
| 30-<40                                 | 1       | 1.07 (0.81, 1.41)  | 1.26 (0.80, 1.99)    |
| 40-<50                                 | 1       | 0.98 (0.83, 1.15)  | 1.42 (1.10, 1.83)    |
| 50-<60                                 | 1       | 1.01 (0.88, 1.15)  | 1.42 (1.15, 1.76)    |
| 60-<70                                 | 1       | 1                  | 1                    |
| 70-<80                                 | 1       | 1.00 (0.86, 1.16)  | 0.50 (0.36, 0.70)    |
| 80 +                                   | 1       | 0.83 (0.67, 1.03)  | 0.12 (0.04, 0.33)    |
| <b>Gender</b>                          |         |                    |                      |
| Male                                   | 1       | 1                  | 1                    |
| Female                                 | 1       | 0.98 (0.88, 1.09)  | 1.03 (0.87, 1.22)    |
| <b>HbA1c (mmol/mol)</b>                |         |                    |                      |
| < 54                                   | 1       | 1                  | 1                    |
| 54-75                                  | 1       | 1.27 (0.99, 1.64)  | 1.32 (0.80, 2.17)    |
| 75+                                    | 1       | 0.75 (0.5*, 0.98)  | 0.82 (0.50, 1.34)    |
| <b>eGFR (ml/min/1.73m<sup>2</sup>)</b> |         |                    |                      |
| < 60                                   | 1       | 1                  | 1                    |
| 60-89                                  | 1       | 1.10 (0.91, 1.32)  | 2.85 (1.53, 5.30)    |
| 90 +                                   | 1       | 1.12 (0.92, 1.37)  | 3.35 (1.80, 6.23)    |
| <b>Time taking metformin (years)</b>   |         |                    |                      |
| < 1                                    | 1       | 1                  | 1                    |
| 1 to <3                                | 1       | 1.22 (1.07, 1.39)  | 1.54 (1.23, 1.93)    |
| > 3                                    | 1       | 1.25 (1.10, 1.42)  | 1.30 (1.04, 1.63)    |
| <b>Cardiovascular disease</b>          |         |                    |                      |
| No CVD                                 | 1       | 1                  | 1                    |
| CVD diagnosis                          | 1       | 1.00 (0.87, 1.16)  | 0.95 (0.72, 1.27)    |
| <b>Retinopathy</b>                     |         |                    |                      |
| No retinopathy                         | 1       | 1                  | 1                    |
| Retinopathy diagnosis                  | 1       | 1.12 (0.99, 1.28)  | 0.78 (0.60, 1.01)    |
| <b>BMI kg/m<sup>2</sup></b>            |         |                    |                      |
| Normal/underweight                     | 1       | 1                  | 1                    |
| Overweight                             | 1       | 1.28 (1.08, 1.52)  | 1.95 (1.21, 3.14)    |
| Obese                                  | 1       | 1.68 (1.43, 1.99)  | 4.98 (3.16, 7.83)    |
| <b>Smoking status</b>                  |         |                    |                      |
| None                                   | 1       | 1                  | 1                    |
| Ex                                     | 1       | 1.01 (0.90, 1.12)  | 0.92 (0.76, 1.11)    |
| Current                                | 1       | 0.99 (0.85, 1.15)  | 0.78 (0.60, 1.01)    |
| <b>Ethnicity</b>                       |         |                    |                      |
| White                                  | 1       | 1                  | 1                    |
| South Asian                            | 1       | 0.73 (0.59, 0.89)  | 0.59 (0.40, 0.86)    |
| Black                                  | 1       | 0.64 (0.48, 0.85)  | 0.45 (0.24, 0.82)    |
| Other                                  | 1       | 0.66 (0.45, 0.97)  | 0.52 (0.25, 1.07)    |
| Mixed                                  | 1       | 1.01 (0.48, 2.12)  | 0.73 (0.15, 3.60)    |
| <b>Patient-level IMD</b>               |         |                    |                      |
| 1 LEAST deprived                       | 1       | 1                  | 1                    |
| 2                                      | 1       | 0.95 (0.80, 1.12)  | 0.98 (0.73, 1.30)    |
| 3                                      | 1       | 0.95 (0.80, 1.12)  | 1.02 (0.76, 1.33)    |
| 4                                      | 1       | 0.79 (0.67, 0.93)  | 0.61 (0.46, 0.81)    |
| 5 MOST                                 | 1       | 0.99 (0.84, 1.18)  | 0.59 (0.44, 0.80)    |
| <b>Calendar time</b>                   |         |                    |                      |
| Early 2014                             | 1       | 1                  | 1                    |
| Late 2014                              | 1       | 1.18 (1.00, 1.38)  | 1.80 (1.24, 2.62)    |
| Early 2015                             | 1       | 1.38 (1.19, 1.60)  | 2.70 (1.92, 3.80)    |
| Late 2015                              | 1       | 1.66 (1.41, 1.95)  | 4.43 (3.14, 6.24)    |
| Early 2016                             | 1       | 2.17 (1.84, 2.57)  | 6.99 (4.99, 9.79)    |
| Late 2016                              | 1       | 2.56 (2.11, 3.10)  | 10.42 (7.33, 14.83)  |
| Early 2017                             | 1       | 2.85 (2.29, 3.54)  | 14.73 (10.23, 21.21) |

**Supplementary Table 3:** Fully adjusted ORs (95% CIs) for prescription of DPP4i or SGLT2i compared with SUs using multinomial logistic regression with multiple imputation to account for missing data, also including adjustment for patient-level IMD (England only: N= 8,217).

**Abbreviations:** SU: Sulfonylurea, DPP4i: dipeptidyl peptidase 4inhibitors, SGLT2i: Sodium-glucose co-transporter-2 inhibitors, HbA1c: Haemoglobin A1c, eGFR: estimated Glomerular Filtration Rate, BMI: Body mass index

| Variable                               | SU, Ref<br>N=2576 | Sensitivity Analysis 1       |                              | Sensitivity Analysis 2       |                               |
|----------------------------------------|-------------------|------------------------------|------------------------------|------------------------------|-------------------------------|
|                                        |                   | DPP4i, OR (95% CI)<br>N=2137 | SGLT2i, OR (95% CI)<br>N=490 | DPP4i, OR (95% CI)<br>N=5285 | SGLT2i, OR (95% CI)<br>N=1488 |
| <b>Age, years</b>                      |                   |                              |                              |                              |                               |
| < 30                                   | 1                 | 1.94 (0.86, 4.35)            | 4.07 (1.42, 11.67)           | 1.36 (0.85, 2.17)            | 2.48 (1.39, 4.40)             |
| 30-<40                                 | 1                 | 0.85 (0.59, 1.22)            | 1.48 (0.85, 2.56)            | 1.01 (0.81, 1.26)            | 1.32 (0.97, 1.81)             |
| 40-<50                                 | 1                 | 0.94 (0.77, 1.16)            | 1.81 (1.31, 2.51)            | 0.98 (0.86, 1.11)            | 1.27 (1.04, 1.52)             |
| 50-<60                                 | 1                 | 0.86 (0.72, 1.02)            | 1.53 (1.16, 2.03)            | 0.98 (0.88, 1.08)            | 1.21 (1.04, 1.42)             |
| 60-<70                                 | 1                 | 1                            | 1                            | 1                            | 1                             |
| 70-<80                                 | 1                 | 0.93 (0.77, 1.12)            | 0.56 (0.36, 0.87)            | 0.96 (0.85, 1.08)            | 0.47 (0.37, 0.60)             |
| 80 +                                   | 1                 | 0.87 (0.67, 1.14)            | 0.14 (0.03, 0.60)            | 0.88 (0.74, 1.04)            | 0.14 (0.07, 0.28)             |
| <b>Gender</b>                          |                   |                              |                              |                              |                               |
| Male                                   | 1                 | 1                            | 1                            | 1                            | 1                             |
| Female                                 | 1                 | 0.94 (0.83, 1.07)            | 1.04 (0.84, 1.29)            | 0.92 (0.85, 1)               | 0.99 (0.87, 1.12)             |
| <b>HbA1c (mmol/mol)</b>                |                   |                              |                              |                              |                               |
| <= 53 (7%)                             | 1                 | 1                            | 1                            | 1                            | 1                             |
| 53-75                                  | 1                 | 1.35 (1.02, 1.79)            | 1.11 (0.66, 1.89)            | 1.41 (1.14, 1.73)            | 1.17 (0.79, 1.71)             |
| 75+ (9%)                               | 1                 | 0.70 (0.53, 0.94)            | 0.78 (0.46, 1.32)            | 0.73 (0.59, 0.90)            | 0.79 (0.54, 1.16)             |
| <b>eGFR (ml/min/1.73m<sup>2</sup>)</b> |                   |                              |                              |                              |                               |
| < 60                                   | 1                 | 1                            | 1                            | 1                            | 1                             |
| 60-89                                  | 1                 | 1.12 (0.91, 1.39)            | 15.45 (3.76, 63.37)          | 1.05 (0.90, 1.23)            | 5.88 (3.29, 10.50)            |
| 90 +                                   | 1                 | 1.18 (0.93, 1.50)            | 16.52 (3.99, 68.29)          | 1.02 (0.86, 1.21)            | 6.77 (3.75, 12.23)            |
| <b>Time taking metformin (years)</b>   |                   |                              |                              |                              |                               |
| < 1                                    | 1                 | 1                            | 1                            | 1                            | 1                             |
| 1 to <3                                | 1                 | 1.20 (1.01, 1.42)            | 1.48 (1.12, 1.95)            | 1.26 (1.13, 1.40)            | 1.40 (1.19, 1.64)             |
| > 3                                    | 1                 | 1.20 (1.02, 1.40)            | 1.24 (0.94, 1.64)            | 1.30 (1.17, 1.43)            | 1.23 (1.05, 1.44)             |
| <b>Cardiovascular disease (CVD)</b>    |                   |                              |                              |                              |                               |
| No CVD                                 | 1                 | 1                            | 1                            | 1                            | 1                             |
| CVD diagnosis                          | 1                 | 0.98 (0.83, 1.17)            | 0.76 (0.53, 1.09)            | 0.94 (0.84, 1.06)            | 0.95 (0.78, 1.16)             |
| <b>Retinopathy</b>                     |                   |                              |                              |                              |                               |
| No retinopathy                         | 1                 | 1                            | 1                            | 1                            | 1                             |
| Retinopathy diagnosis                  | 1                 | 0.97 (0.83, 1.14)            | 0.87 (0.64, 1.17)            | 1.09 (0.99, 1.21)            | 1.02 (0.86, 1.21)             |
| <b>BMI kg/m<sup>2</sup></b>            |                   |                              |                              |                              |                               |
| Normal/underweight                     | 1                 | 1                            | 1                            | 1                            | 1                             |
| Overweight                             | 1                 | 1.10 (0.88, 1.37)            | 2.48 (1.21, 5.07)            | 1.31 (1.14, 1.51)            | 2.22 (1.52, 3.26)             |
| Obese                                  | 1                 | 1.62 (1.31, 2.00)            | 6.01 (3.02, 11.99)           | 1.72 (1.50, 1.98)            | 5.66 (3.93, 8.17)             |
| <b>Smoking status</b>                  |                   |                              |                              |                              |                               |
| None                                   | 1                 | 1                            | 1                            | 1                            | 1                             |
| Ex                                     | 1                 | 0.96 (0.84, 1.10)            | 0.90 (0.71, 1.14)            | 0.98 (0.90, 1.07)            | 1.00 (0.87, 1.15)             |
| Current                                | 1                 | 0.91 (0.76, 1.10)            | 0.76 (0.56, 1.03)            | 0.93 (0.83, 1.05)            | 0.80 (0.67, 0.96)             |
| <b>Ethnicity</b>                       |                   |                              |                              |                              |                               |
| White                                  | 1                 | 1                            | 1                            | 1                            | 1                             |
| South Asian                            | 1                 | 0.72 (0.57, 0.92)            | 0.50 (0.31, 0.81)            | 0.70 (0.57, 0.86)            | 0.60 (0.42, 0.89)             |
| Black                                  | 1                 | 0.59 (0.41, 0.85)            | 0.45 (0.23, 0.91)            | 0.66 (0.49, 0.90)            | 0.55 (0.29, 1.06)             |
| Other                                  | 1                 | 0.92 (0.59, 1.43)            | 0.48 (0.18, 1.25)            | 0.78 (0.50, 1.24)            | 0.87 (0.40, 1.67)             |
| Mixed                                  | 1                 | 1.29 (0.53, 3.14)            | 0.36 (0.04, 3.00)            | 1.17 (0.55, 2.49)            | 2.05 (0.61, 6.91)             |
| <b>Calendar time</b>                   |                   |                              |                              |                              |                               |
| Early 2014                             | 1                 | 1                            | 1                            | 1                            | 1                             |
| Late 2014                              | 1                 | 1.19 (0.98, 1.45)            | 1.73 (1.07, 2.80)            | 1.13 (1.00, 1.29)            | 1.80 (1.37, 2.35)             |
| Early 2015                             | 1                 | 1.37 (1.14, 1.65)            | 3.02 (1.97, 4.64)            | 1.35 (1.20, 1.53)            | 2.62 (2.04, 3.36)             |
| Late 2015                              | 1                 | 1.72 (1.40, 2.11)            | 6.17 (4.02, 9.48)            | 1.58 (1.38, 1.80)            | 3.87 (3.01, 4.98)             |
| Early 2016                             | 1                 | 2.31 (1.88, 2.86)            | 7.82 (5.09, 12.02)           | 2.00 (1.75, 2.29)            | 5.68 (4.43, 7.28)             |
| Late 2016                              | 1                 | 2.35 (1.84, 2.99)            | 8.55 (5.41, 13.50)           | 2.17 (1.87, 2.52)            | 7.90 (6.12, 10.20)            |
| Early 2017                             | 1                 | 2.90 (2.20, 3.82)            | 15.10 (9.41, 24.61)          | 2.44 (2.07, 2.88)            | 11.11 (8.53, 14.47)           |

**Supplementary Table 4:** Fully adjusted ORs (95% CIs) for prescription of DPP4i or SGLT2i compared with SUs in sensitivity analyses: 1. Using a complete case analysis approach. 2. Model included individuals that were censored or died in the 60 days after prescribing of the first intensification treatment, using multiple imputation to account for missing data. **Abbreviations:** SU: Sulfonylurea, DPP4i: dipeptidyl peptidase 4inhibitors, SGLT2i: Sodium-glucose co-transporter-2 inhibitors, HbA1c: Haemoglobin A1c, eGFR: estimated Glomerular Filtration Rate, BMI: Body mass index
